# Supplementary material for: Mechanism of activation of SGK3 by growth factors via the Class 1 and Class 3 PI3Ks
Source: PubMed Central journal article supplement (PMC5748840; doi:10.1042/bcj20170650), 2018-01-02
Supplement: BCJ-475-117-s1.pdf [file BCJ-475-117-s1.pdf]

Figure S1

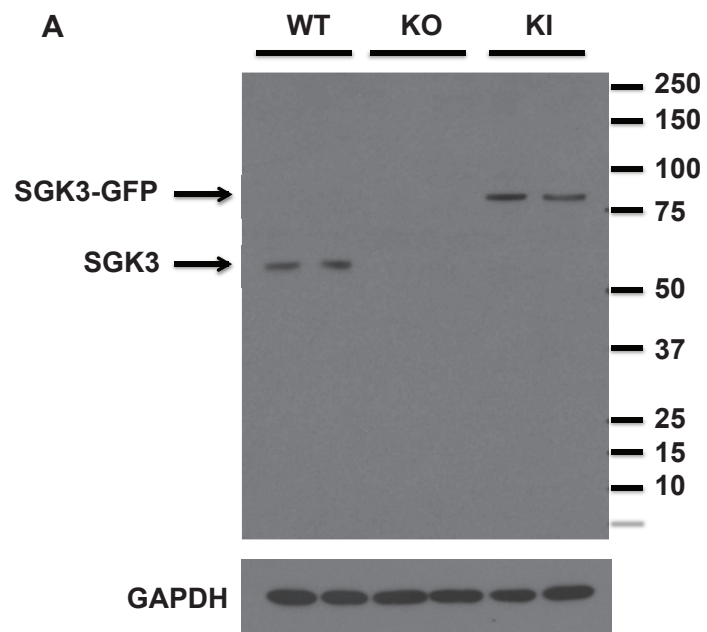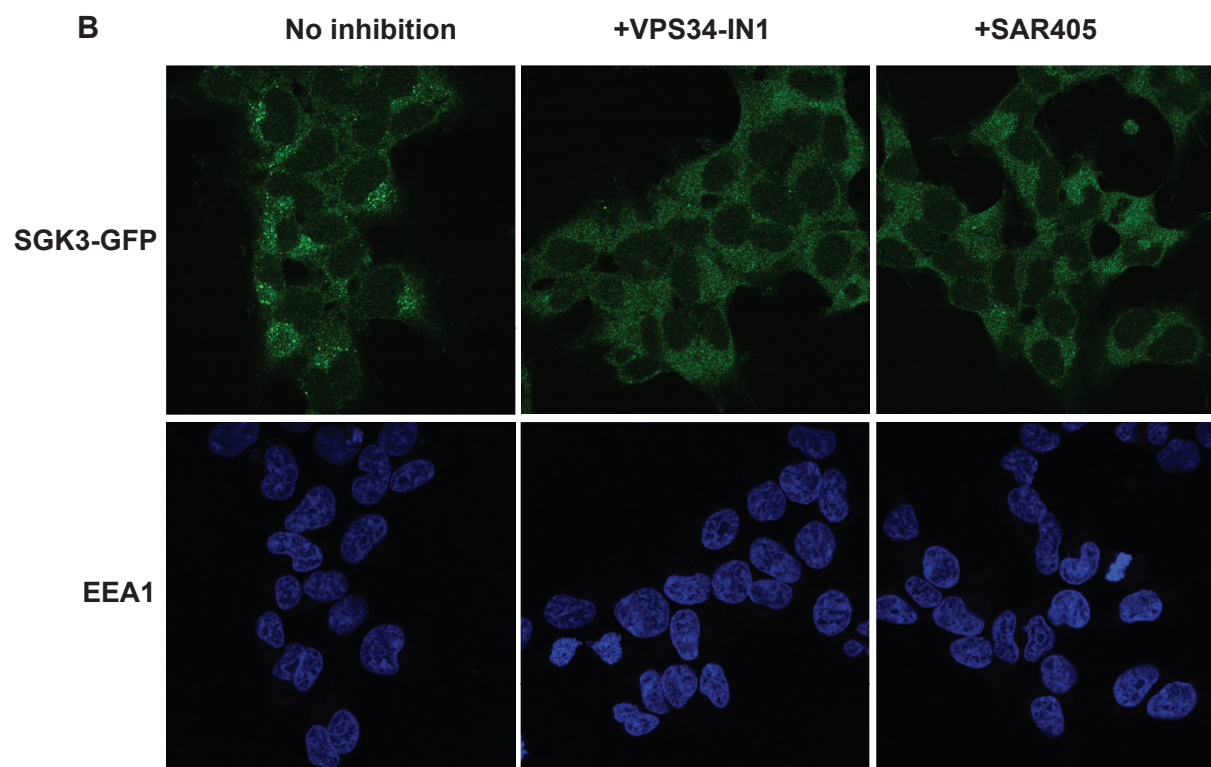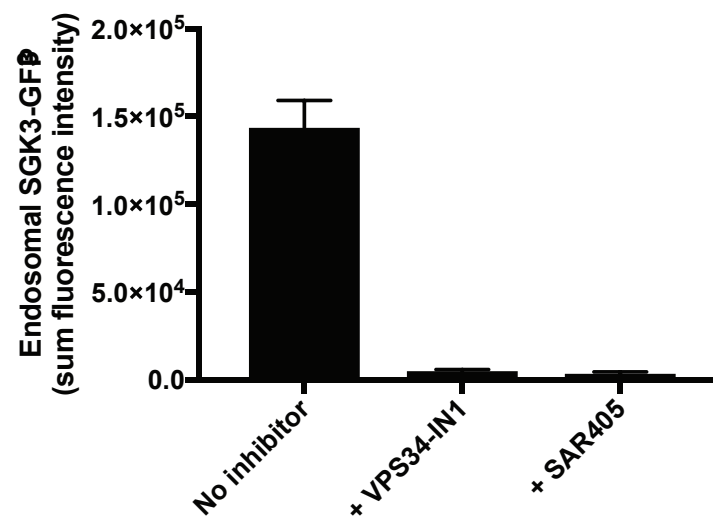

**Figure S1 – Generation of SGK3 knock out and GFP-SGK3 knock in cell lines and the impact of hVPS34 inhibition on GFP-SGK3 localisation. (A)** Wild type (WT), SGK3 knock-out (KO) and GFP-GFP-SGK3 knock-in (KI) HEK293 cells were lysed and cell lysates subjected to immunoblot analysis with the indicated antibodies. **(B)** GFP-SGK3 knock-in HEK293 cells cultured in 10% (v/v) serum were treated with or without 1 $\mu$ M VPS34-IN1 or 1 $\mu$ M SAR405 for 1 hour prior to fixation with 4% (v/v) paraformaldehyde. GFP distribution in cells was visualized using chicken anti-GFP primary and anti-chicken Alexa Fluor-488 to enhance the GFP signal (upper panel). DAPI was used to stain nuclei (lower panel). Histogram represents quantitation of GFP-SGK3 on endosomal structures using sum of intensity of fluorescent signal from staining of GFP  $\pm$ S.E.M. following the various treatments.
